# Supplementary material
Source: publisher figshare collection journal article supplement (https://acs.figshare.com/ndownloader/files/17448488)
Supplement: Supplementary file 1 [file 17448488]

## Supporting Information

### **A safe and scaled up route to inert ammonia oxide hydroxylammonium azide ( $\text{H}_7\text{N}_5\text{O}_2$ ), hydrazinium azide ( $\text{H}_5\text{N}_5$ ) and ammonium azide ( $\text{H}_4\text{N}_4$ )**

Gang Zhao,<sup>‡</sup> Dheeraj Kumar,<sup>§</sup> Lu Hu,<sup>‡</sup> and Jean'ne M. Shreeve<sup>\*‡</sup>

<sup>‡</sup> Department of Chemistry, University of Idaho, Moscow, ID 83844-2343 USA, E-mail:  
[jshreeve@uidaho.edu](mailto:jshreeve@uidaho.edu)

<sup>§</sup> Department of Chemistry, Indian Institute of Technology, Roorkee, Roorkee, Uttarakhand  
247667, India

### **Table of Contents**

|                                                     |    |
|-----------------------------------------------------|----|
| General Methods.....                                | S2 |
| Experimental Section.....                           | S2 |
| X-Ray Crystallographic Data .....                   | S3 |
| DSC scans of <b>1</b> , <b>2</b> and <b>3</b> ..... | S4 |
| References and Notes .....                          | S5 |

## General Methods

All reagents were purchased from VWR or AK Scientific in analytical grade and were used as supplied. The melting and decomposition (onset) points were obtained on a differential scanning calorimeter (TA Instruments Co., model Q2000) at a scan rate of 5 °C min<sup>-1</sup>. IR spectra were recorded using KBr pellets for solids on a Nicolet Thermo model AVATAR 370 spectrometer. Densities were measured at room temperature using a Micromeritics AccuPyc 1340 gas pycnometer. Elemental analyses were carried out on a Vario Micro cube Elementar Analyser. The sensitivities to impact (IS) and friction (FS) were determined according to BAM standards.

The geometric optimization and frequency analyses of the structures are based on available single-crystal structures using the B3LYP functional with the 6-31+G\*\* basis set. Single-point energies were calculated at the MP2/6-311++G\*\* level.<sup>S1</sup> All of the structures were characterized to be true local energy minima on the potential energy surface without imaginary frequencies.

## Experimental Section

### Caution

Although no explosions or hazards were observed during the preparation and handling of these compounds, all are potentially explosive materials. Mechanical actions involving scratching or scraping must be avoided. In addition, all of the compounds must be synthesized on a small scale. Manipulations must be carried out in a hood behind a safety shield. Eye protection and leather gloves must be worn at all times.

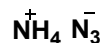

In one 100 mL flask, trimethylsilyl azide (TMSN<sub>3</sub>) (1.15 g, 10 mmol) was dissolved in methanol (30 mL), and ammonium fluoride (0.37 g, 10 mmol) was added to the solution at room temperature. After 6 h, the colorless crystalline ammonium azide (0.54 g, 9.0 mmol) was obtained by air drying in a yield of >90%. M.p. 141 °C; IR (KBr):  $\tilde{\nu}$  3144, 3012, 2834, 2036, 1818, 1418, 663, 651, 626 cm<sup>-1</sup> (w); Elemental analysis: Calcd (%) for H<sub>4</sub>N<sub>4</sub> (75.05): C 0.00, H 6.71, N 93.29; Found: C 0.13, H 6.53, N 92.13.

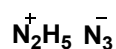

### Hydrazonium azide (H<sub>5</sub>N<sub>5</sub>), 2

Hydrazine monohydrate (5 g, 0.1 mol) was dissolved in water (15 mL), and 48% aqueous hydrofluoric acid solution (4.0 g, 0.1 mol) was added to the solution at 0 °C. Then the solution was stirred at 0 °C for 4 h, and warmed to room temperature. The white solid hydrazinium fluoride was obtained by air drying with a yield of 86% (4.5 g). Then trimethylsilyl azide (TMSN<sub>3</sub>) (1.15 g, 10 mmol) was dissolved in methanol (30 mL), and hydrazinium fluoride (0.5 g, 9.6 mmol) was added to the solution at room temperature. After 8 h, the colorless crystalline hydrazinium azide (0.6 g, 8.6 mmol) was obtained by air drying in a yield of >90%. M.p. 75 °C; IR (KBr):  $\tilde{\nu}$  3356, 3285, 3053, 2033, 1598, 1508, 1338, 1234, 1094, 953, 649, 643, 460 cm<sup>-1</sup> (w); Elemental analysis: Calcd (%) for H<sub>5</sub>N<sub>5</sub> (75.05): C 0.00, H 6.71, N 93.29; Found: C 0.37, H 6.69, N 93.76.

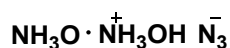

**Ammonia oxide hydroxylammonium azide (H<sub>7</sub>N<sub>5</sub>O<sub>2</sub>), 3**

In a round-bottomed flask (100 mL), 48% aqueous hydrofluoric acid solution (4.0 g, 0.1 mol) was dissolved in water (30 mL), and hydroxylamine (6.6 g, 50% solution in water) (1 mL) was added dropwise to the solution. The system was stirred continuously at room temperature for 6 h. The pink solid hydroxylammonium fluoride (4.8 g, 9 mmol) was collected after being dried by air. Then trimethylsilyl azide (1.15 g, 10 mmol) was dissolved in methanol (30 mL), hydroxylammonium fluoride (1.06 g, 20 mmol) was added to the solution at room temperature. After 8 h, the colorless solid, ammonia oxide hydroxylammonium azide (0.92 g, 8.4 mmol) was obtained in 84 % yield. M.p 64 °C; T<sub>d(onset)</sub> = 114 °C; IR (KBr):  $\tilde{\nu}$  3063, 2688, 2037, 1595, 1508, 1184, 1084, 846, 624, 450 cm<sup>-1</sup> (w); Elemental analysis: Calcd (%) for H<sub>7</sub>N<sub>5</sub>O<sub>2</sub> (109.05): C 0.00, H 6.47, N 64.20; Found: C 0.13, H 6.15, N 62.36.

**Crystallographic Data****Table S1.** Crystal data and structure refinement for **1**, **2** and **3**.

| Compound                                       | 1                                  | 2                             | 3                                            |
|------------------------------------------------|------------------------------------|-------------------------------|----------------------------------------------|
| CCDC                                           | 1920046<br>(1886886) <sup>S2</sup> | 1905107                       | 1905108                                      |
| Formula                                        | H <sub>8</sub> N <sub>8</sub>      | H <sub>5</sub> N <sub>5</sub> | H <sub>7</sub> N <sub>5</sub> O <sub>2</sub> |
| <i>D</i> <sub>calc.</sub> / g cm <sup>-3</sup> | 1.365                              | 1.419                         | 1.611                                        |
| $\mu$ /mm <sup>-1</sup>                        | 0.111                              | 0.115                         | 1.314                                        |
| Formula Weight                                 | 120.14                             | 75.09                         | 109.11                                       |
| Color                                          | colorless                          | colorless                     | colorless                                    |
| Shape                                          | block                              | chunk                         | needle                                       |
| Size/mm <sup>3</sup>                           | 0.27×0.18×0.10                     | 0.20×0.18×0.07                | 0.29×0.09×0.02                               |
| <i>T</i> /K                                    | 173(2)                             | 243(2)                        | 173(2)                                       |
| Crystal System                                 | orthorhombic                       | monoclinic                    | orthorhombic                                 |
| Flack Parameter                                | -                                  | -                             | 0.4(3)                                       |
| Hooft Parameter                                | -                                  | -                             | 0.4(2)                                       |
| Space Group                                    | <i>Pmna</i>                        | <i>P2<sub>1</sub>/n</i>       | <i>Pca2<sub>1</sub></i>                      |
| <i>a</i> /Å                                    | 8.9331(10)                         | 5.641(2)                      | 19.9594(4)                                   |
| <i>b</i> /Å                                    | 3.7824(4)                          | 5.521(2)                      | 3.55530(10)                                  |
| <i>c</i> /Å                                    | 8.6519(10)                         | 11.306(4)                     | 19.0219(3)                                   |
| $\alpha$ /°                                    | 90                                 | 90                            | 90                                           |
| $\beta$ /°                                     | 90                                 | 93.261(4)                     | 90                                           |
| $\gamma$ /°                                    | 90                                 | 90                            | 90                                           |
| <i>V</i> /Å <sup>3</sup>                       | 292.34(6)                          | 351.5(2)                      | 1349.83(5)                                   |
| <i>Z</i>                                       | 2                                  | 4                             | 12                                           |
| <i>Z'</i>                                      | 0.25                               | 1                             | 3                                            |
| Wavelength/Å                                   | 0.710730                           | 0.710730                      | 1.541838                                     |
| Radiation type                                 | MoK $\alpha$                       | MoK $\alpha$                  | CuK $\alpha$                                 |
| $\theta$ <sub>min</sub> /°                     | 3.278                              | 3.610                         | 4.649                                        |
| $\theta$ <sub>max</sub> /°                     | 27.482                             | 27.526                        | 72.127                                       |
| Measured Refl.                                 | 4901                               | 6369                          | 12824                                        |

|                          |        |        |        |
|--------------------------|--------|--------|--------|
| Independent Refl.        | 357    | 814    | 2583   |
| Reflections with I > 318 |        | 604    | 2035   |
| 2(I)                     |        |        |        |
| $R_{int}$                | 0.0276 | 0.0567 | 0.0715 |
| Parameters               | 34     | 67     | 208    |
| Restraints               | 0      | 0      | 1      |
| Largest Peak             | 0.202  | 0.181  | 0.196  |
| Deepest Hole             | -0.171 | -0.173 | -0.215 |
| GooF                     | 1.179  | 1.041  | 0.997  |
| $wR_2$ (all data)        | 0.0748 | 0.1280 | 0.1025 |
| $wR_2$                   | 0.0714 | 0.1145 | 0.0930 |
| $R_1$ (all data)         | 0.0284 | 0.0636 | 0.0585 |
| $R_1$                    | 0.0261 | 0.0454 | 0.0402 |

DSC curves of **1**, **2** and **3**

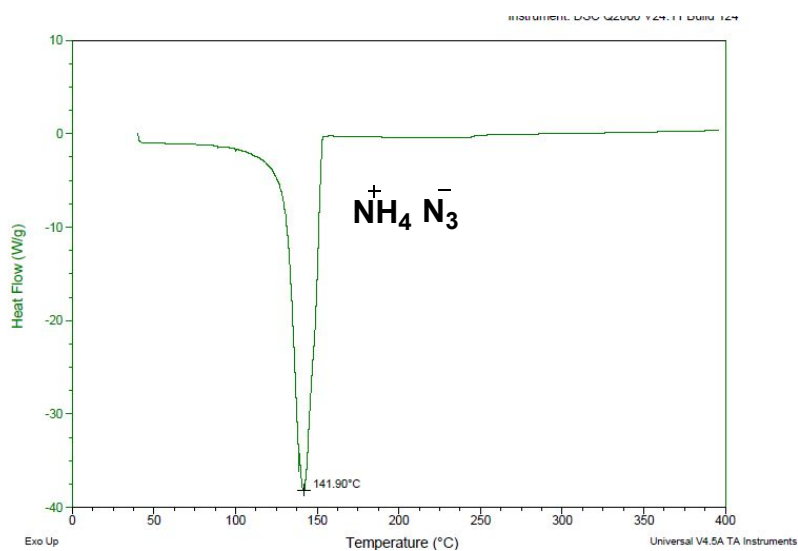

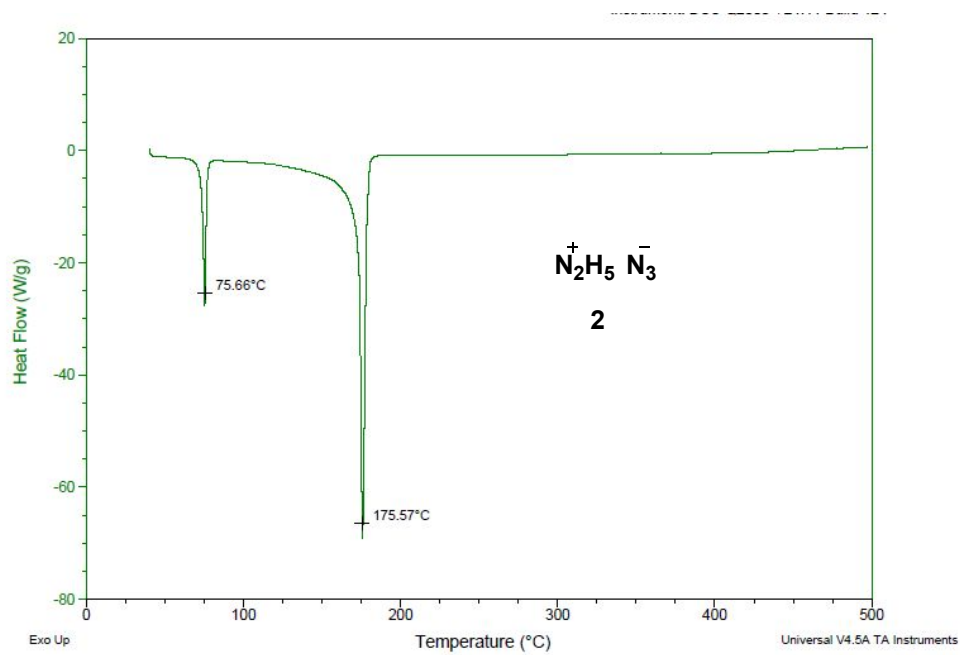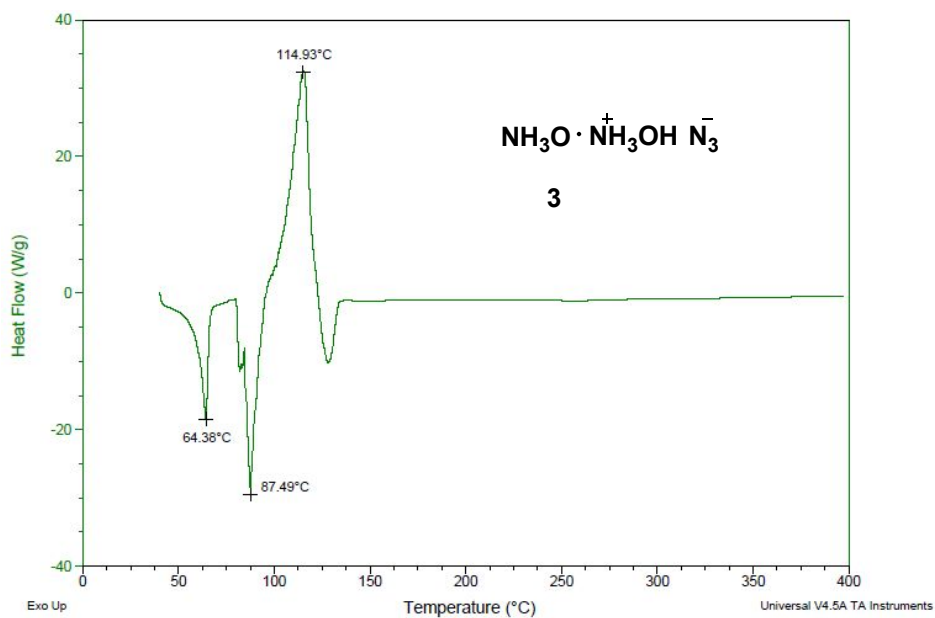

## Reference

S1. R. G. Parr, W. Yang, *Density Functional Theory of Atoms and Molecules*; Oxford University Press: New York, **1989**.

S2 This CCDC number are applied by Dr. Ralf Haiges (DOI: 10.5517/ccdc.csd.cc21bg95)S1
